# Supplementary material for: Unusual SARS-CoV-2 intrahost diversity reveals lineage superinfection
Source: PubMed Central journal article supplement (PMC9176291; doi:10.1099/mgen.0.000751), 2022-03-17
Supplement: mgen-8-0751-s001.pdf [file mgen-8-0751-s001.pdf]

CE-FIOCRUZ-00657

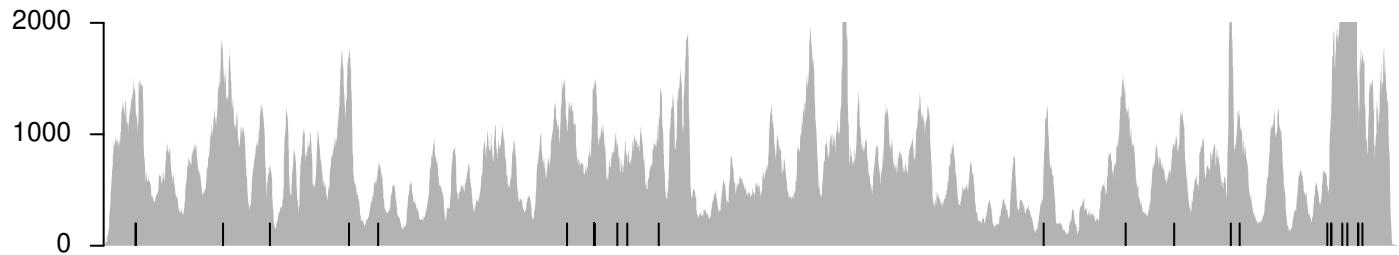

Ceara-30

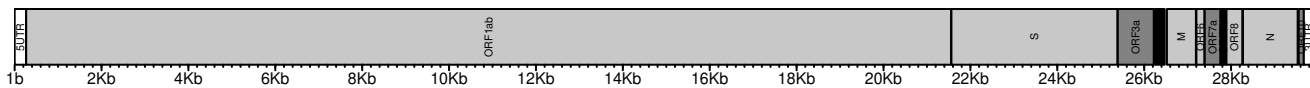

# AM-FIOCRUZ-21142481RG

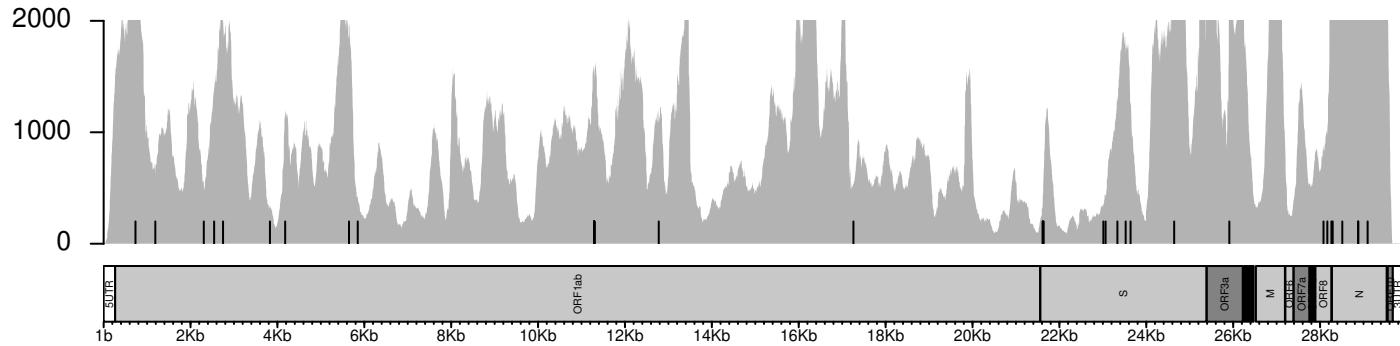

# RS-FIOCRUZ-2060

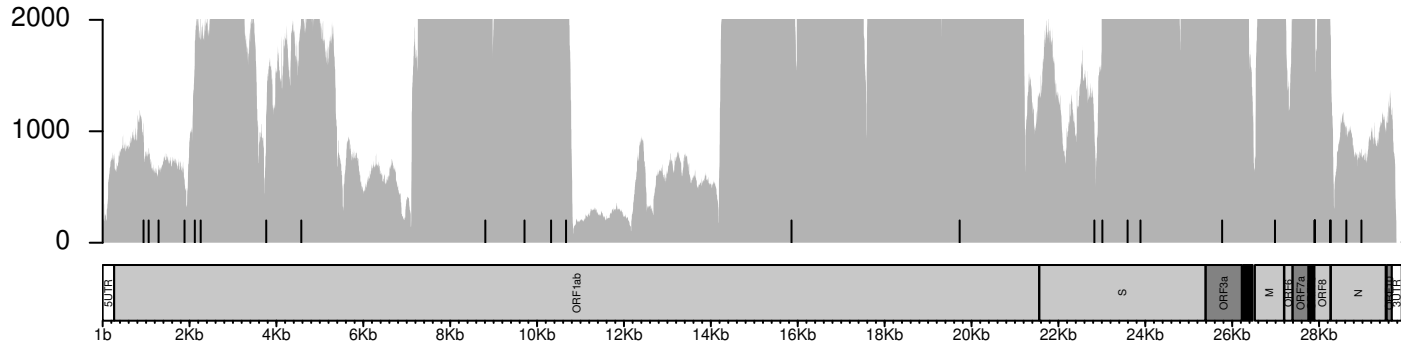

# BA-FIOCRUZ-4739

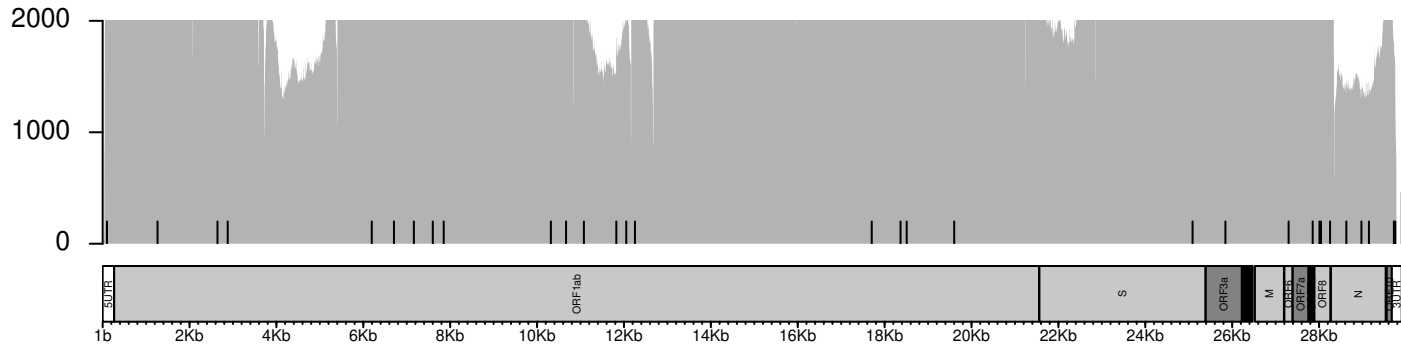

# ES-FIOCRUZ-6993

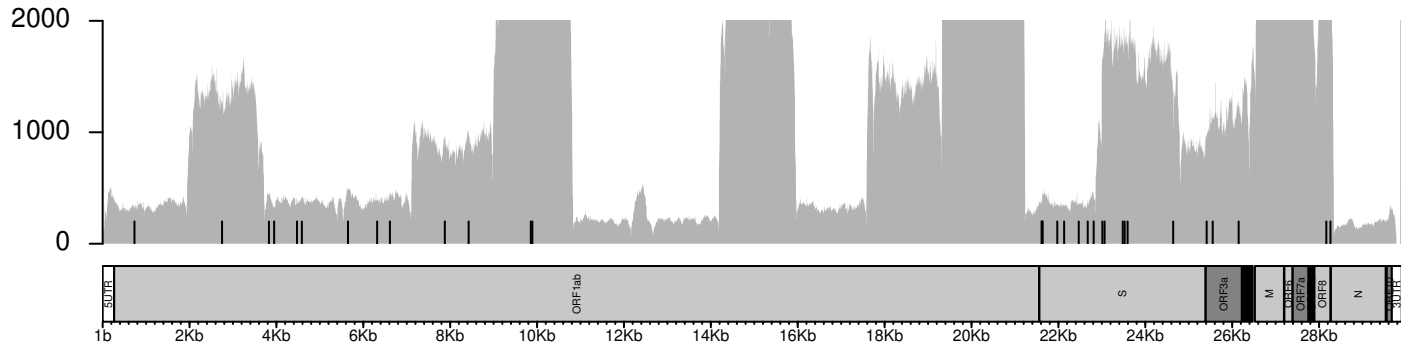

# CE-FIOCRUZ-6559

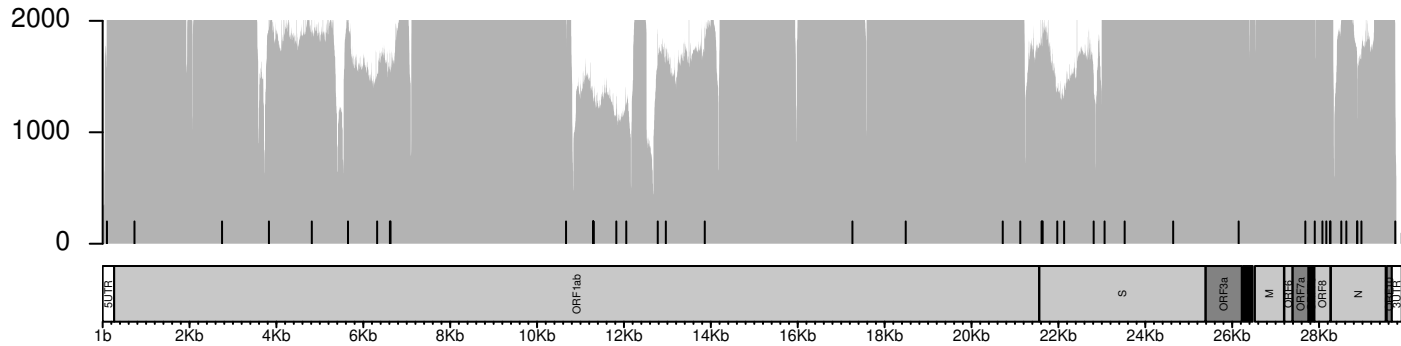

# SC-FIOCRUZ-10891

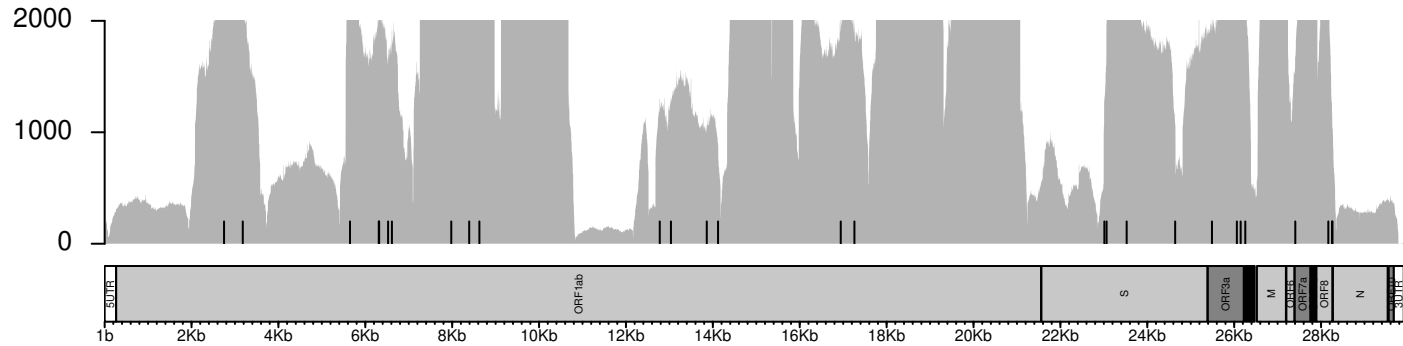

# BA-FIOCRUZ-10781

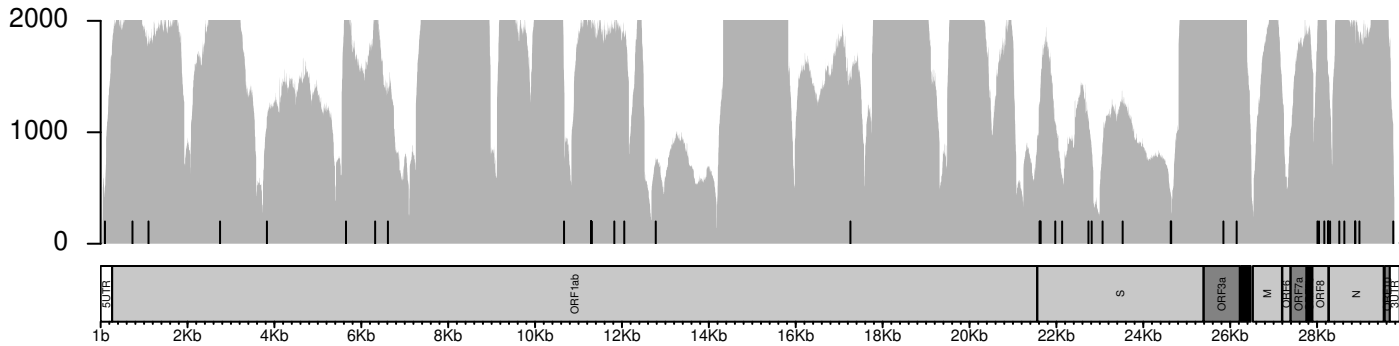



# AM-FIOCRUZ-21890619RGS

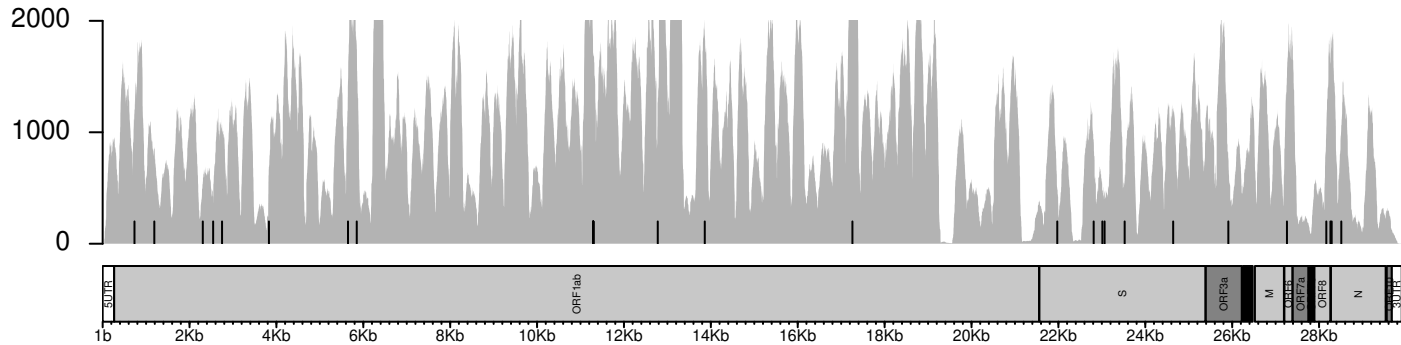

**Supplementary File 1** - Black vertical bars represents minor allele frequency sites. Y axis represents read depth.
