# Supplementary material for: Unusual SARS-CoV-2 intrahost diversity reveals lineage superinfection
Source: PubMed Central journal article supplement (PMC9176291; doi:10.1099/mgen.0.000751), 2022-03-17
Supplement: mgen-8-0751-s002.pdf [file mgen-8-0751-s002.pdf]

**A** No-Codetection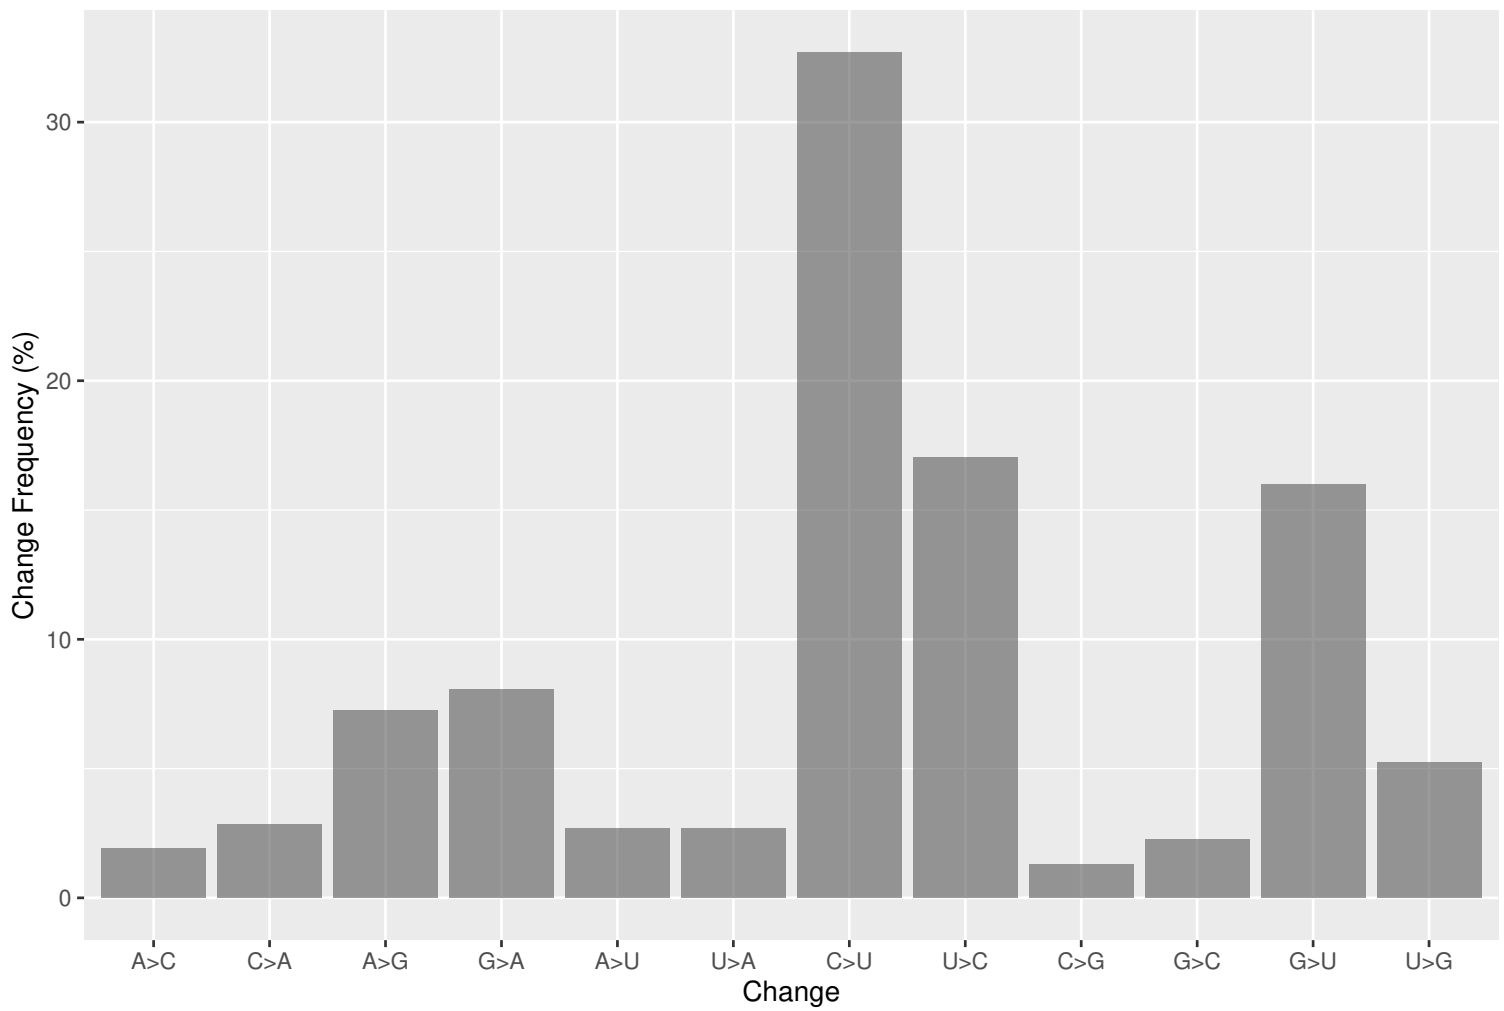**B** Codetection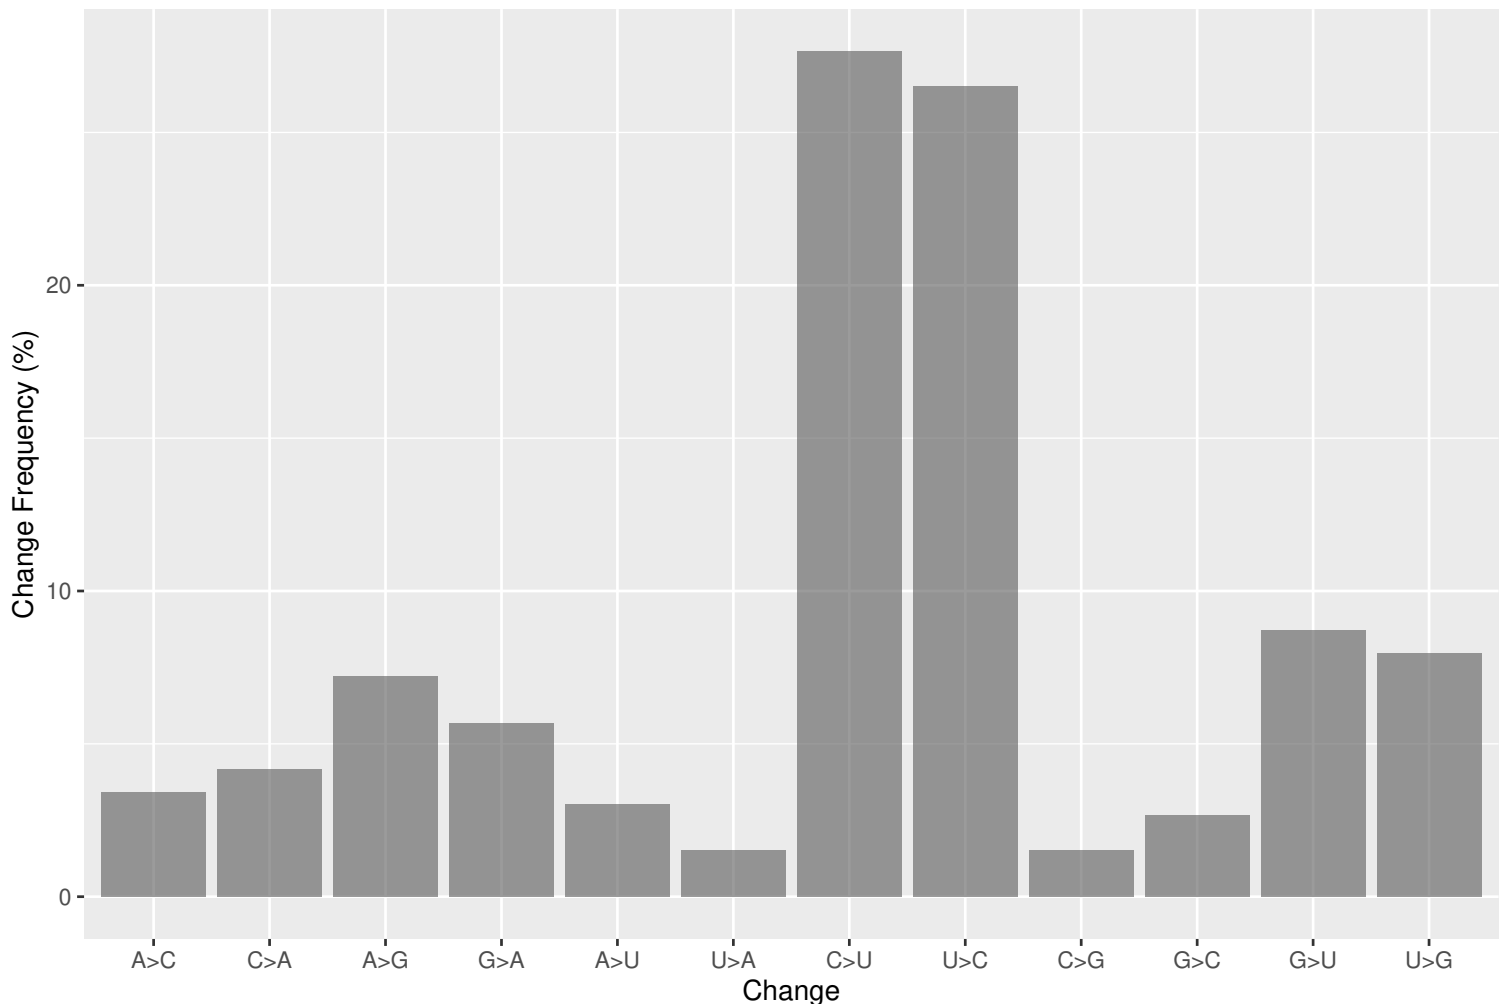

**Supplementary File 2** - Distribution of nucleotide changes between MajV and MinV genomes. **A.** Samples without co-detection signal. **B** Samples with co-detection signal.
